# Supplementary material
Source: PubMed Central journal article supplement (PMC8663607)
Supplement: NIHMS1758041-supplement-Supplementary_Material.pdf [file NIHMS1758041-supplement-Supplementary_Material.pdf]

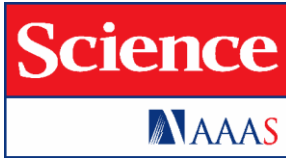

## Supplementary Materials for

### **The Ccr4-Not complex monitors the translating ribosome for codon optimality**

Robert Buschauer\*, Yoshitaka Matsuo\*, Takato Sugiyama, Ying-Hsin Chen,  
Najwa Alhusaini, Thomas Sweet, Ken Ikeuchi, Jingdong Cheng, Yasuko Matsuki,  
Risa Nobuta, Andrea Gilmozzi, Otto Berninghausen, Petr Tesina, Thomas Becker,  
Jeff Coller†, Toshifumi Inada†, Roland Beckmann†

\*These authors contributed equally to this work.

†Corresponding author. Email: beckmann@genzentrum.lmu.de (R.B.);  
toshifumi.inada.a3@tohoku.ac.jp (T.I.); jmc71@case.edu (J.C.)

Published 17 April 2020, *Science* **368**, eaay6912 (2020)  
DOI: 10.1126/science.aay6912

#### **This PDF file includes:**

Figs. S1 to S7  
Tables S1 to S3  
Caption for Movie S1  
References

#### **Other Supplementary Material for this manuscript includes the following:**

(available at [science.sciencemag.org/content/368/6488/eaay6912/suppl/DC1](https://science.sciencemag.org/content/368/6488/eaay6912/suppl/DC1))

MDAR Reproducibility Checklist (.pdf)  
Movie S1 (.mp4)

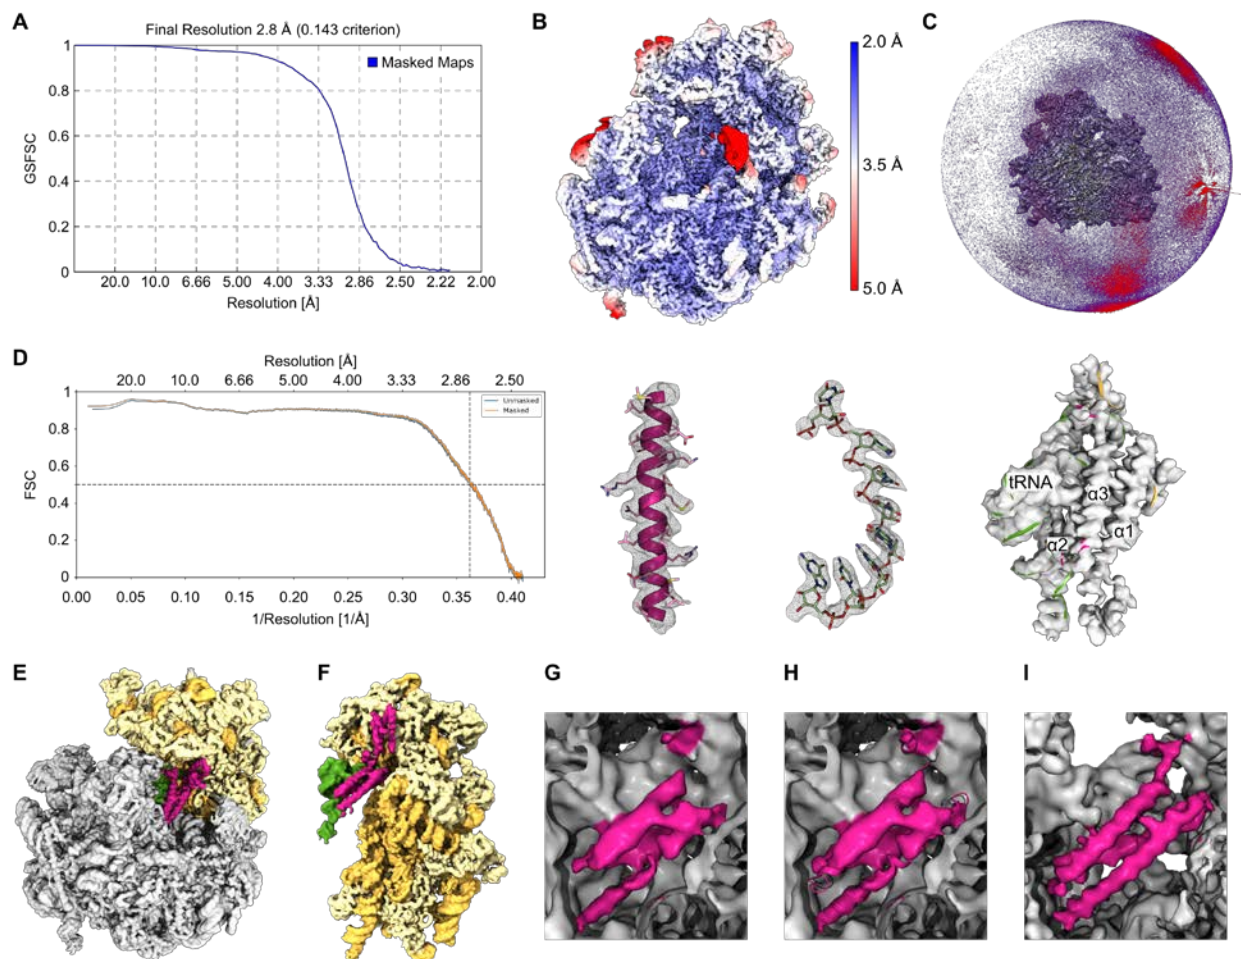

**Fig. S1.**

(A) Gold Standard Fourier shell correlation of the Not5 bound 80S ribosome. (B) Cryo-EM density of the Not5 bound 80S ribosome colored according to local resolution. (C) Euler angle distribution of the final Not5 bound 80S reconstruction. (D) Model-to-map-FSC of the Not5 bound 80S ribosome and representative densities of a helix of the Not5-NTD, of ribosomal RNA and the full Not5-NTD. (E) Cryo-EM density of the cross-linked Not5 bound 80S ribosome (F) Cryo-EM density of the 40S subunit, the P-site tRNA and the extended Not5-NTD of the cross-linked Not5 bound 80S ribosome. (G) Cryo-EM density of the Not5 bound 80S ribosome in absence of antibiotics. (H) Cryo-EM density of the Not5 bound 80S ribosome in absence of antibiotics with

a rigid body docked model of Not5-NTD. (I) Cryo-EM density of the Not5 bound 80S ribosome stabilized by tigecycline..

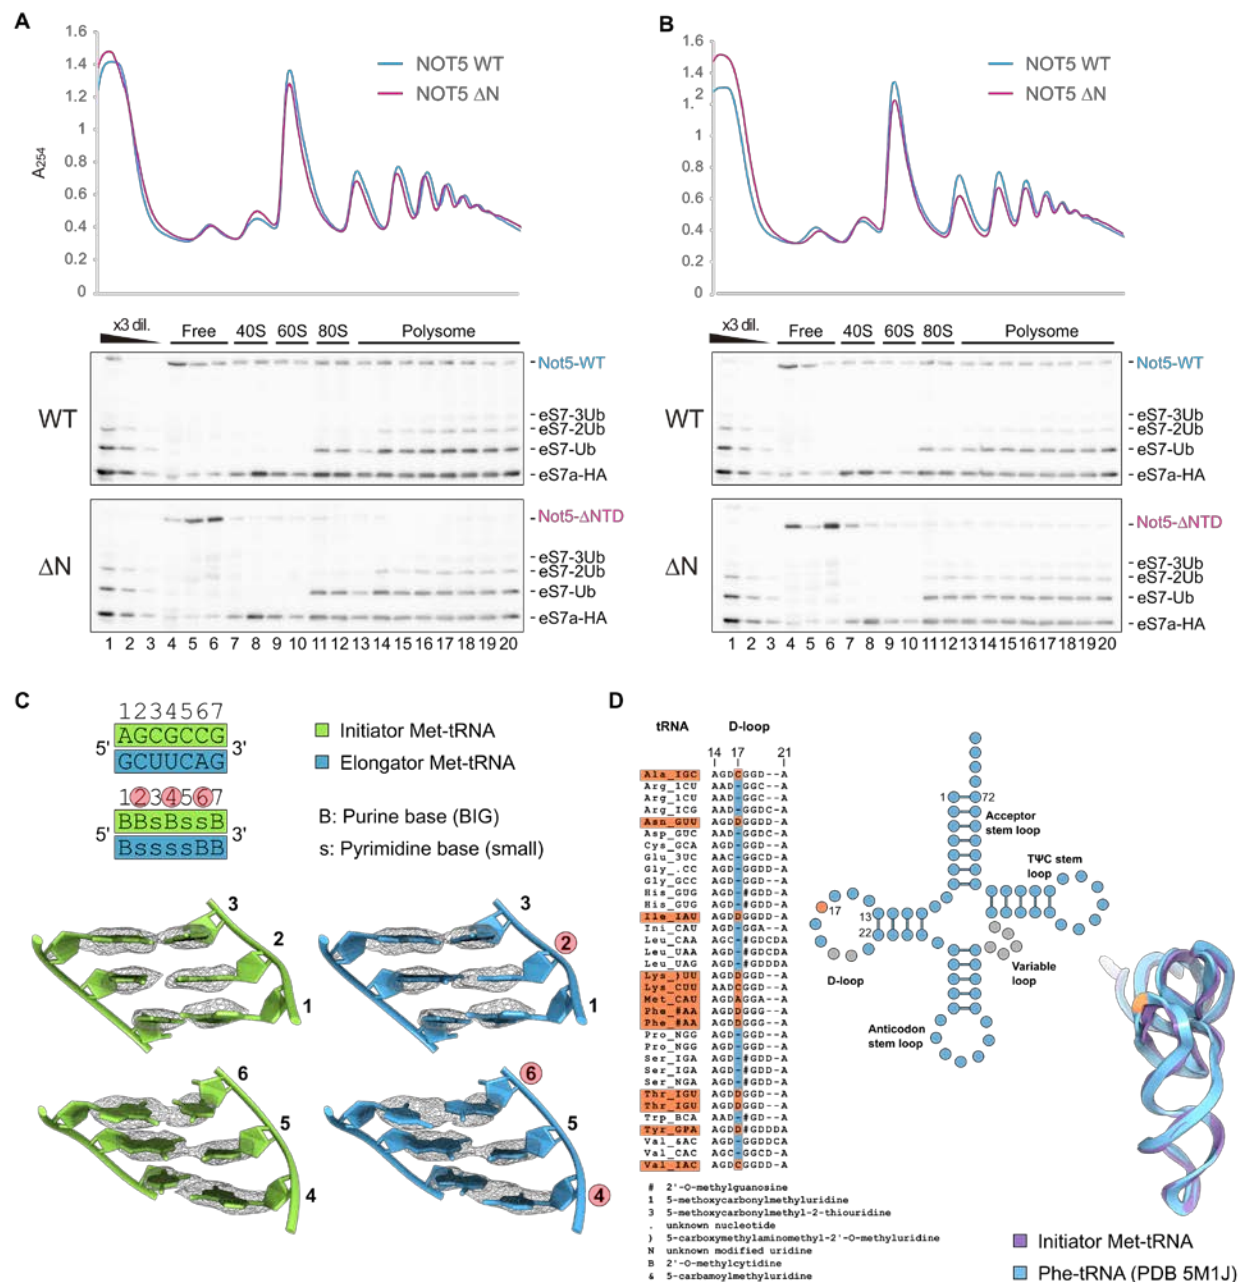

**Fig. S2.**

(A to B). Replicates of density gradient fractionation profiles of Not5-HA and Not5- $\Delta$ NTD-HA strains and corresponding Western blot detection of the respective Not5 proteins and of ribosomal protein eS7-HA. The signals at higher molecular weight correspond to ubiquitinated species of eS7-HA. (C) Comparison between initiator and elongator Met-tRNA. The elongator tRNA does not fit into the cryo-EM density (grey mesh, compare positions 2, 4, 6). (D) Comparison of tRNAs

featuring short and long D-loops as defined by absence or presence of a nucleotide in position 17

(List according to <http://trna.bioinf.uni-leipzig.de/>).

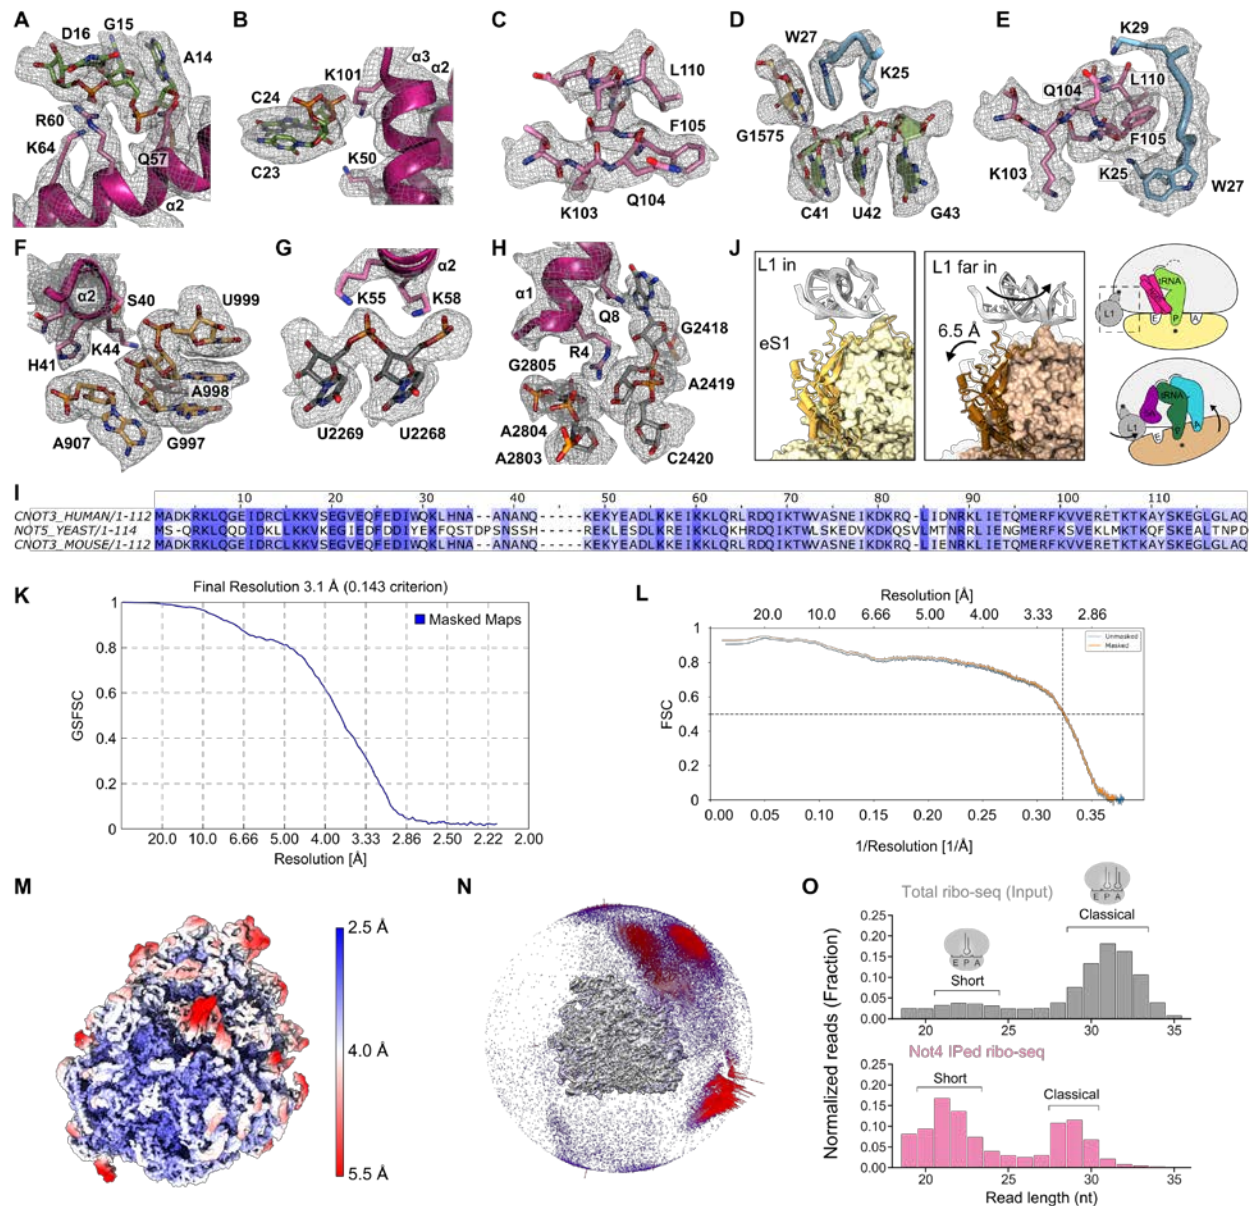

**Fig. S3.**

(A) Interactions of Not5-NTD with the D-loop of tRNA<sup>Met</sup>. (B) Interactions of Not5 with the D-stem of tRNA<sup>Met</sup>. (C to E) Interactions between the tRNA-clamp-motif (tCM) of Not5, the anticodon stem loop of tRNA<sup>Met</sup>, the N-terminus of eS25 and 18S rRNA. (F) Interactions of Not5-NTD with 18S rRNA. (G to H) Interactions of Not5 with 25S rRNA. (I) Sequence alignment of the Not5-NTD from human, yeast and mouse (aligned with T-Coffee, <https://www.ebi.ac.uk/Tools/msa/tcoffee/>). (J) Movement of the L1 stalk base from the in-position

in the non-rolled (--/PP/--) ribosome to the far-in position in the eIF5A bound rolled (AA/PP/--) ribosome. **(K)** Gold Standard Fourier shell correlation of the eIF5A bound 80S ribosome. **(L)** Model-to-map-FSC of the eIF5A bound 80S ribosome **(M)** Cryo-EM density of the eIF5A bound 80S ribosome colored according to local resolution. **(N)** Euler angle distribution of the final eIF5A bound 80S reconstruction. **(O)** Length distribution of mRNA fragments during selective ribosome profiling (monosome-enriched approach, fig. S5B) using Not4 as bait (bottom) and the total ribosomal fraction as control (top)..

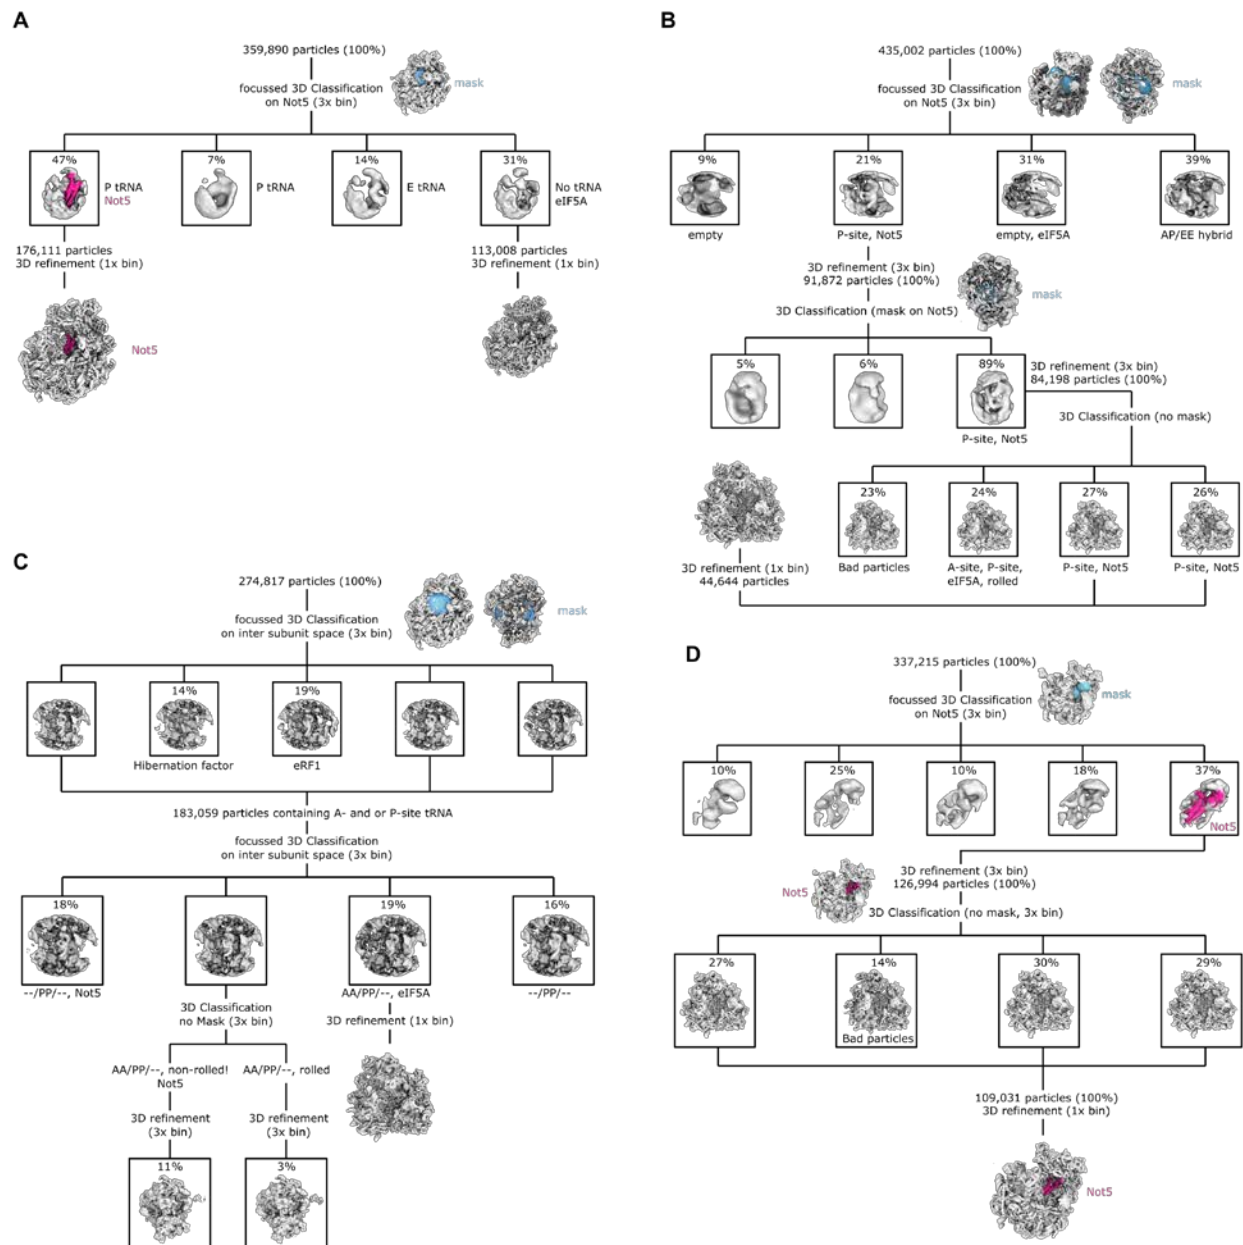

**Fig. S4.**

(A) Sorting scheme of the tigecycline stalled monosome sample. (B) Sorting scheme of the tigecycline stalled polysome sample. (C) Sorting scheme of the cycloheximide stalled monosome sample. (D) Sorting scheme of the tigecycline stalled cross-linked monosome sample.



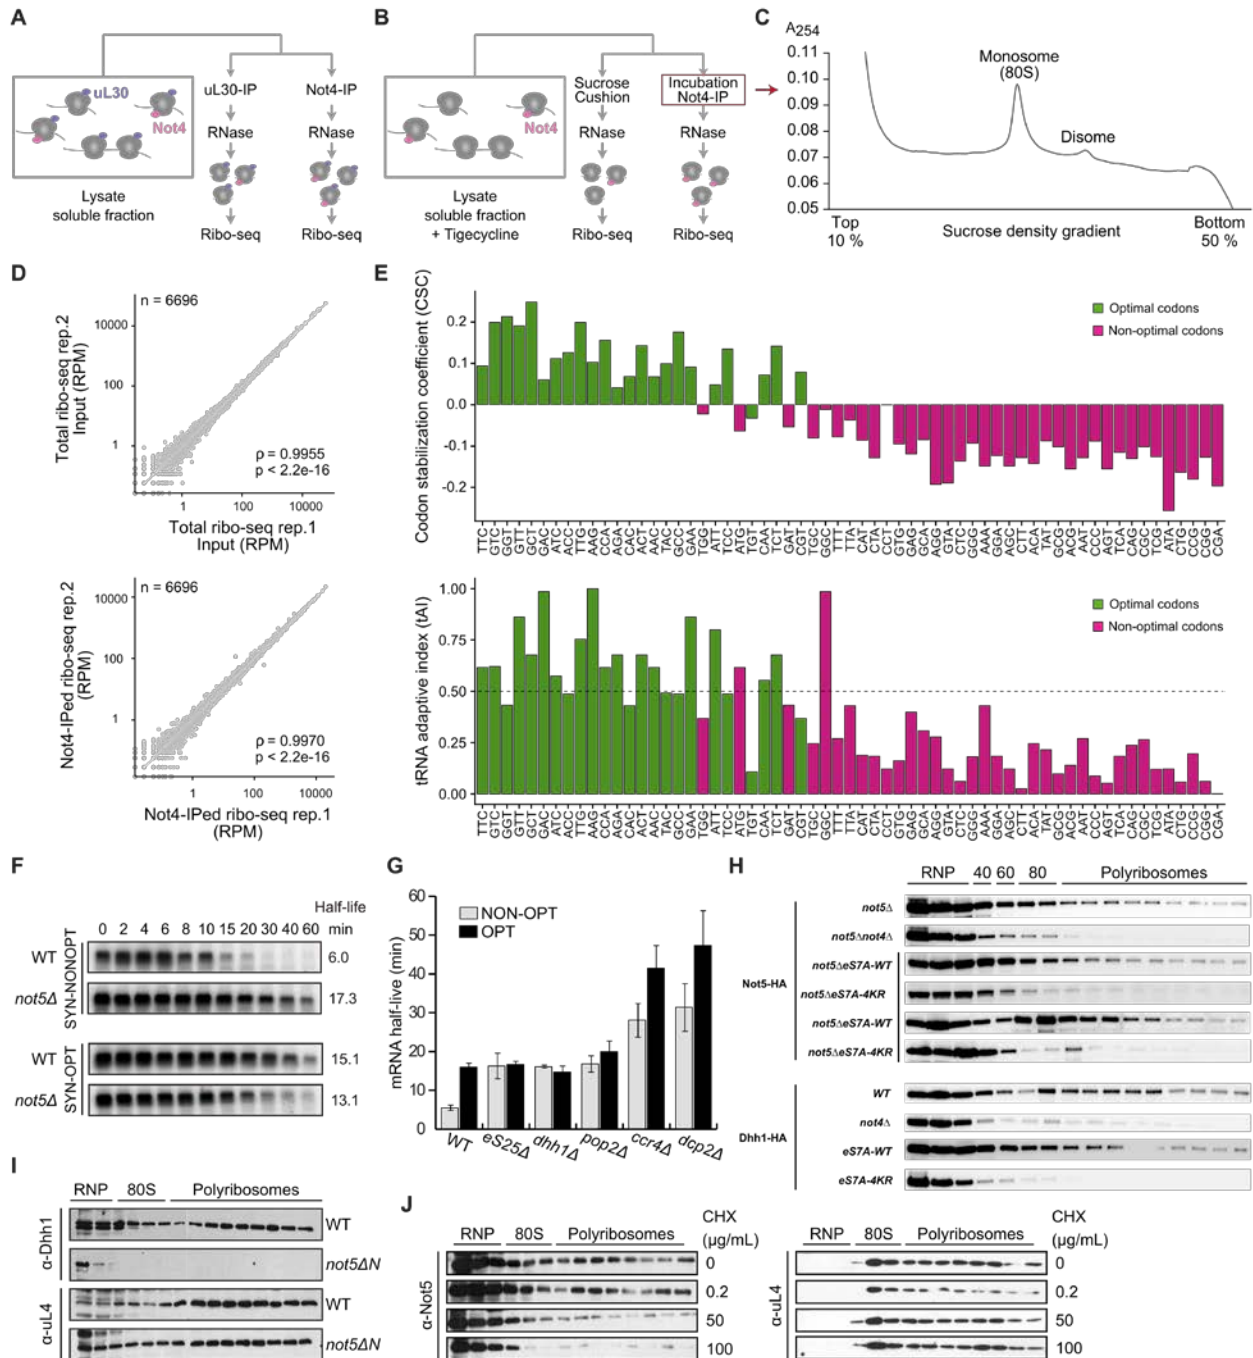

**Fig. S5.**

(A) Fast selective ribosome profiling approach. (B to C) Monosome-enriched selective ribosome profiling approach. (D) Quality control of the total ribosomal fraction (top) and the Not4-IP fraction (bottom) of the monosome-enriched selective ribosome profiling. (E) CSC of individual

codons present in the A-site listed according to their enrichment through Not4-IP (top). tAI of individual codons in the A-site listed according to their enrichment through Not4-IP (bottom). (F) Half-life determination of synthetic optimal and non-optimal *PGK1pG* reporter mRNAs through northern blotting at various timepoints after transcriptional shutoff (T) in either wildtype or *not5Δ* strains. (G) Half-lives of optimal and non-optimal PGK1pG reporter mRNAs in wildtype and *eS25Δ*, *dhh1Δ*, *pop2Δ*, *ccr4Δ* and *dcp2Δ*, as determined by northern blotting. (H) Top 6 lanes: Presence of Not5-HA on the translation machinery in *not5Δ*, *not5Δnot4Δ*, *eS7a-WT*, *eS7a-4KR* cells determined by Western blotting of sucrose density gradients. Bottom 4 lanes: Presence of Dhh1-HA on the translation machinery in *WT*, *not4Δ*, *eS7a-WT*, *eS7a-4KR* cells determined by Western blotting of sucrose density gradients. (I) Presence of Dhh1 (or uL4 as control) on the translation machinery determined by Western blotting of sucrose density gradients in wildtype and *not5ΔNTD* strains. (J) Presence of Not5 (or uL4 as control) on the translation machinery determined by Western blotting of sucrose density gradients in presence of different concentrations of cycloheximide.

A

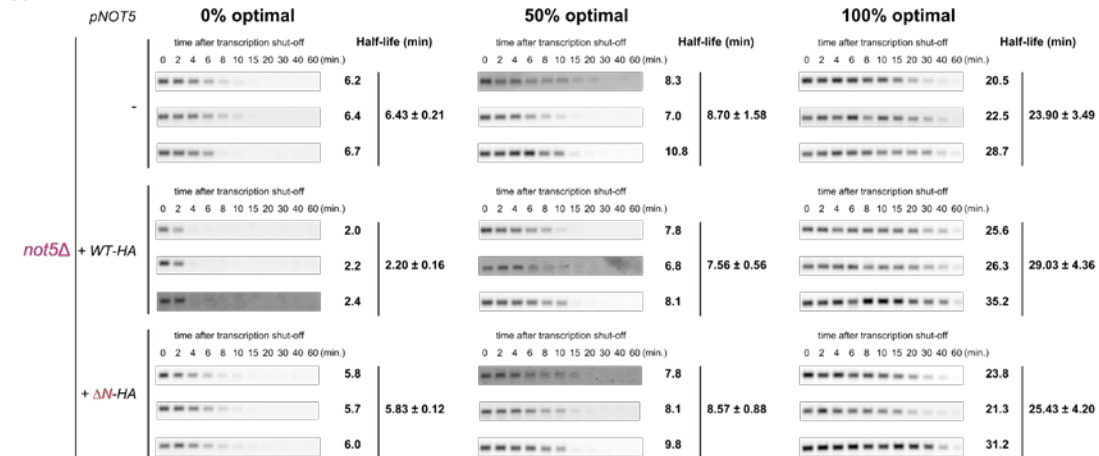

B

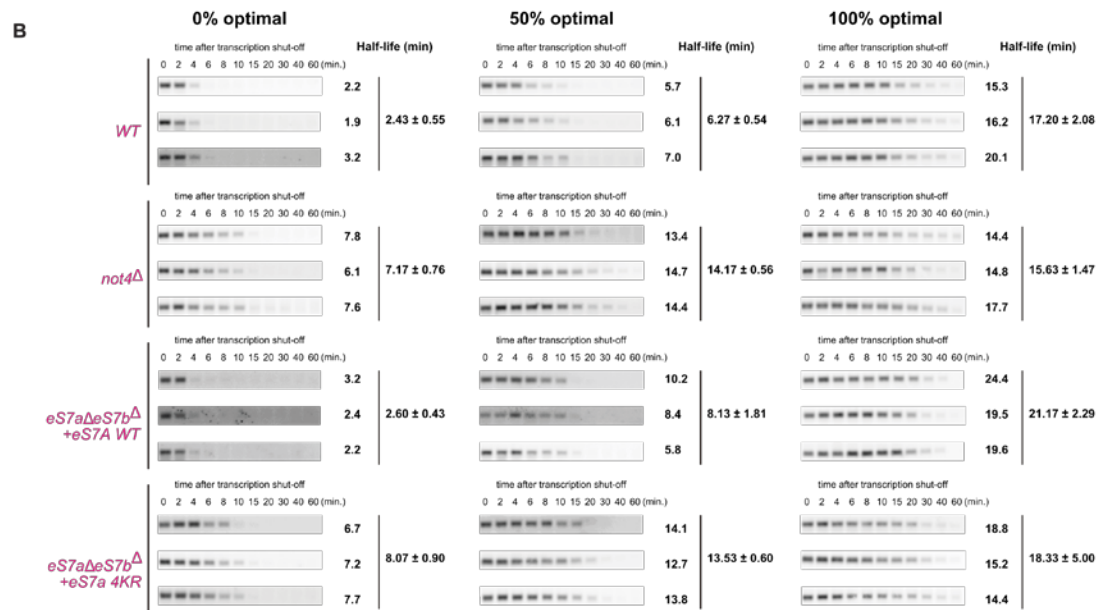

C

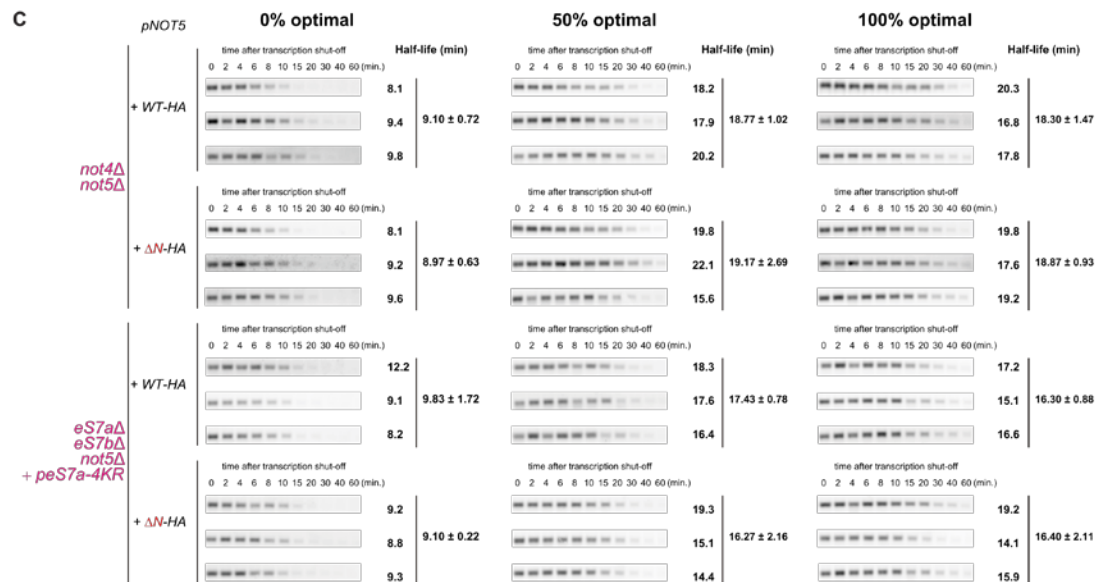

**Fig. S6.**

(A) Northern blotting of *HIS3* reporter mRNA upon transcriptional shutoff in *not5Δ* cells in combination with expression of different constructs from plasmids (pNot5, pNot5-ΔN). (B) Northern blotting of *HIS3* reporter mRNA upon transcriptional shutoff in *WT*, *not4Δ*, *eS7a/bΔ*, *not5ΔeS7a/bΔ* cells in combination with expression of different constructs from plasmids (peS7a, peS7a-4KR). (C) Northern blotting of *HIS3* reporter mRNA upon transcriptional shutoff in *not4Δnot5Δ* cells in combination with expression of different constructs from plasmids (pNot5, pNot5-ΔN, peS7a, peS7a-4KR).

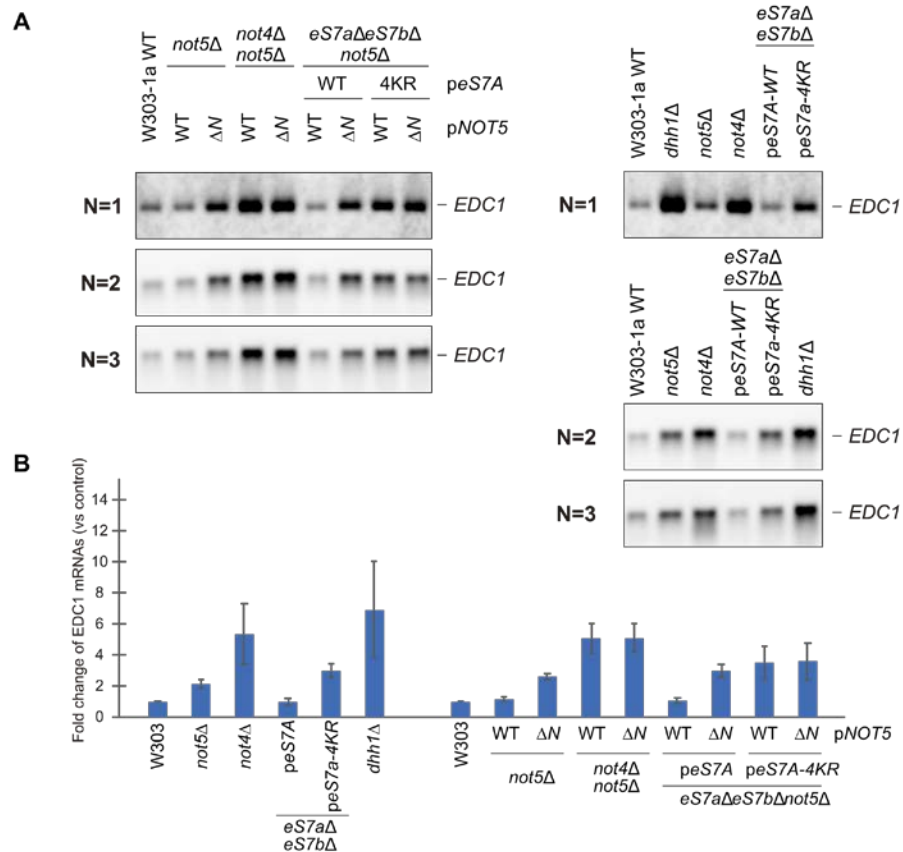

**Fig. S7.**

(A) Northern blots of EDC1 mRNA in different cell-lines. Stabilization of EDC1 mRNA, which is used as proxy for a decapping defect (B) Quantification of EDC1 mRNA stabilization based on the Northern Blots shown in (A) (data are mean +/- SD, N=3).

**Table S1.****Cryo-EM data collection, refinement and validation statistics**

|                                                     | Not5-80S<br>EMD-10431<br>PDB 6TB3 | Not5-poly<br>EMD-10431<br>- | eIF5A-80S<br>EMD- 10537<br>PDB 6TNU | Not5-80S-x1<br>EMD-10431<br>- |
|-----------------------------------------------------|-----------------------------------|-----------------------------|-------------------------------------|-------------------------------|
| <b>Data collection and processing</b>               |                                   |                             |                                     |                               |
| Microscope                                          | Titan Krios                       | Titan Krios                 | Titan Krios                         | Titan Krios                   |
| Detector                                            | Falcon II                         | Falcon II                   | Falcon II                           | Falcon II                     |
| Automation software                                 | EPU                               | EPU                         | EPU                                 | EPU                           |
| Magnification                                       | 75,000                            | 75,000                      | 75,000                              | 75,000                        |
| Voltage (kV)                                        | 300                               | 300                         | 300                                 | 300                           |
| Exposure rate (e <sup>-</sup> /pix/s)               | 55                                | 55                          | 55                                  | 55                            |
| Electron exposure (e <sup>-</sup> /Å <sup>2</sup> ) | 28                                | 28                          | 28                                  | 28                            |
| Number of frames used                               | 10                                | 10                          | 10                                  | 10                            |
| Defocus range (μm)                                  | -1.1 – -2.8                       | -1.1 – -2.8                 | -1.1 – -2.8                         | -1.1 – -2.8                   |
| Pixel size (Å)                                      | 1.084                             | 1.084                       | 1.084                               | 1.084                         |
| Symmetry imposed                                    | -                                 | -                           | -                                   | -                             |
| Micrographs used                                    | 9,945                             | 9,611                       | 12,697                              | 10,654                        |
| Initial particle images (no.)                       | 557,059                           | 828,516                     | 1,378,230                           | 589,191                       |
| Particle images used (no.)                          | 359,890                           | 435,002                     | 274,817                             | 337,215                       |
| Final particle images (no.)                         | 176,111                           | 44,644                      | 50,989                              | 109,031                       |
| Map overall resolution (Å)                          | 2.8                               | 3.2                         | 3.1                                 | 2.9                           |
| FSC threshold                                       | 0.143                             | 0.143                       | 0.143                               | 0.143                         |
| <b>RS Refinement (Phenix)</b>                       |                                   |                             |                                     |                               |
| Initial model used (PDB code)                       | 4V88                              | -                           | 6TB3, 5GAK                          | -                             |
| Model resolution (Å)                                | 2.6 / 2.8                         | -                           | 2.9 / 3.1                           | -                             |
| FSC threshold                                       | 0.143 / 0.5                       | -                           | 0.143 / 0.5                         | -                             |
| Map sharpening <i>B</i> factor (Å <sup>2</sup> )    | -80                               | -80                         | -80                                 | -80                           |
| Model composition                                   |                                   |                             |                                     |                               |
| Nonhydrogen atoms                                   | 205,032                           | -                           | 204,962                             | -                             |
| Protein residues                                    | 11,472                            | -                           | 11,497                              | -                             |
| Nucleotides                                         | 5,351                             | -                           | 5,391                               | -                             |
| Ligands                                             | 335                               | -                           | 10                                  | -                             |
| mean <i>B</i> factors (Å <sup>2</sup> )             |                                   |                             |                                     |                               |
| Protein                                             | 71.58                             | -                           | 76.23                               | -                             |
| Ligand                                              | 40.82                             | -                           | 47.83                               | -                             |
| R.m.s. deviations                                   |                                   |                             |                                     |                               |
| Bond lengths (Å)                                    | 0.006                             | -                           | 0.009                               | -                             |
| Bond angles (°)                                     | 0.856                             | -                           | 0.950                               | -                             |
| <b>Validation</b>                                   |                                   |                             |                                     |                               |
| MolProbity score                                    | 1.50                              | -                           | 1.93                                | -                             |
| Clashscore                                          | 2.66                              | -                           | 6.91                                | -                             |
| Poor rotamers (%)                                   | 0.27                              | -                           | 0.01                                | -                             |
| Ramachandran plot                                   |                                   |                             |                                     |                               |
| Favored (%)                                         | 93.10                             | -                           | 89.91                               | -                             |
| Outliers (%)                                        | 0.08                              | -                           | 0.06                                | -                             |
| C-beta deviations (%)                               | 0.01                              | -                           | 0.00                                | -                             |
| CaBLAM outliers (%)                                 | 4.22                              | -                           | 5.22                                | -                             |
| Model-Map scores                                    |                                   |                             |                                     |                               |
| CC (mask/box/peaks/volume)                          | 0.90/0.91/0.87/0.89               | -                           | 0.83/0.87/0.80/0.83                 | -                             |
| Mean CC for ligands                                 | 0.83                              | -                           | 0.74                                | -                             |
| EMRinger score (Not5-NTD)                           | 2.79                              | -                           | -                                   | -                             |

**Table S2.**

Yeast strains used in this study

| <b>Name</b> | <b>Genotype</b>                                                                                                                  | <b>Source</b> |
|-------------|----------------------------------------------------------------------------------------------------------------------------------|---------------|
| yJC151      | MATa, ura3, leu2, his3, met15                                                                                                    | (46)          |
| yJC1708     | ura3, leu2, his3, met15 or MET15, LYS2, not5::LEU2                                                                               | This study    |
| yJC1892     | MATa, ura3, leu2, his3, met15 [pGAL-PGK1-SYNOP-pG, URA3]                                                                         | (4)           |
| yJC1893     | MATa, ura3, leu2, his3, met15 [pGAL-PGK1-SYNNONOP-pG, URA3]                                                                      | (4)           |
| yJC1913     | MATa, ura3, leu2, his3, met15, dhh1::NEO [pGAL-PGK1-SYNOP-pG, URA3]                                                              | (4)           |
| yJC1914     | MATa, ura3, leu2, his3, met15, dhh1::NEO [pGAL-PGK1-SYNNONOP-pG, URA3]                                                           | (4)           |
| yJC1917     | MATa, ura3, leu2, his3, lys2, dcp2::NEO [pGAL-PGK1-SYNOP-pG, URA3]                                                               | (4)           |
| yJC1918     | MATa, ura3, leu2, his3, lys2, dcp2::NEO [pGAL-PGK1-SYNNONOP-pG, URA3]                                                            | (4)           |
| yJC1961     | MATa, ura3, his3, leu2, met15, ccr4::NEO [pGAL-PGK1-SYNOP-pG, URA3]                                                              | (4)           |
| yJC1962     | MATa, ura3, leu2, his3, met15, ccr4::NEO [pGAL-PGK1-SYNNONOP-pG, URA3]                                                           | (4)           |
| yJC2364     | MATa, ura3, his3, leu2, met15, pop2::NEO [pGAL-PGK1-SYNOP-pG, URA3]                                                              | (4)           |
| yJC2365     | MATa, ura3, his3, leu2, met15, pop2::NEO [pGAL-PGK1-SYNNONOP-pG, URA3]                                                           | (4)           |
| yJC2499     | MATa, ura3, leu2, his3, met15, [N-terminally optimal FLAG tagged 0% optimal HIS3 under the control of the GAL1 promoter, URA3]   | (8)           |
| yJC2504     | MATa, ura3, leu2, his3, met15, [N-terminally optimal FLAG tagged 50% optimal HIS3 under the control of the GAL1 promoter, URA3]  | (8)           |
| yJC2509     | MATa, ura3, leu2, his3, met15, [N-terminally optimal FLAG tagged 100% optimal HIS3 under the control of the GAL1 promoter, URA3] | (8)           |
| yJC2587     | ura3, leu2, his3, met15 or MET15, LYS2, not5::LEU2, [pGAL-PGK1-SYNOP-pG, URA3]                                                   | This study    |

|          |                                                                                                                                                       |            |
|----------|-------------------------------------------------------------------------------------------------------------------------------------------------------|------------|
| yJC2588  | ura3, leu2, his3, met15 or MET15, LYS2, not5::LEU2, [pGAL-PGK1-SYNNONOP-pG, URA3]                                                                     | This study |
| yJC2708  | MATa, ura3, leu2, his3, met15, NOT5-HA::HIS                                                                                                           | This study |
| yJC2721  | ura3, leu2, his3, met15 or MET15, LYS2, not5::LEU2, [N-terminally optimal FLAG tagged 0% optimal HIS3 under the control of the GAL1 promoter, URA3]   | This study |
| yJC2722  | ura3, leu2, his3, met15 or MET15, LYS2, not5::LEU2, [N-terminally optimal FLAG tagged 50% optimal HIS3 under the control of the GAL1 promoter, URA3]  | This study |
| yJC2723  | ura3, leu2, his3, met15 or MET15, LYS2, not5::LEU2, [N-terminally optimal FLAG tagged 100% optimal HIS3 under the control of the GAL1 promoter, URA3] | This study |
| yJC2809  | MATa, ura3, leu2, his3, lys2, rps25a::KANMX, rps25b::KANMX [pGAL-PGK1-SYNOP-pG, URA3]                                                                 | This study |
| yJC2810  | MATa, ura3, leu2, his3, lys2, rps25a::KANMX, rps25b::KANMX [pGAL-PGK1-SYNOP-pG, URA3]                                                                 | This study |
| W303-1a  | MATa ade2 his3 leu2 trp1 ura3 can1                                                                                                                    | Lab. Stock |
| Not4-FTP | MATa ade2 his3 leu2 trp1 ura3 can1 NOT4-FTP::natNT2                                                                                                   | (47)       |
| uL30-TAP | MATa ade2 his3 leu2 trp1 ura3 can1 uL30-TAP::TRP1                                                                                                     | (47)       |
| YLD258   | MATa ade2 his3 leu2 trp1 ura3 can1 <i>not4Δ::kanMX6</i>                                                                                               | Lab. Stock |
| Y124     | MATa ade2 his3 leu2 trp1 ura3 can1 <i>eS7aΔ::HIS3MX6 eS7bΔ::natNT2 p416-eS7A-HA</i>                                                                   | Lab. Stock |
| YSG125   | MATa ade2 his3 leu2 trp1 ura3 can1 <i>not5Δ::natNT2 p416-NOT5-HA</i>                                                                                  | This study |
| YSG131   | MATa ade2 his3 leu2 trp1 ura3 can1 <i>not5Δ::HIS3MX6 not4Δ::kanMX6 p416NOT5-HA</i>                                                                    | This study |
| YSG132   | MATa ade2 his3 leu2 trp1 ura3 can1 <i>not5Δ::kanMX4 eS7aΔ::HIS3MX6 eS7bΔ::natNT2 p416-eS7A-HA</i>                                                     | This study |
| YSA024   | MATa ade2 his3 leu2 trp1 ura3 can1 <i>dhh1Δ::kanMX4</i>                                                                                               | Lab. Stock |



**Table S3.**

Plasmids and oligos used in this study

| <b>Name</b>                 | <b>Description</b>                                                                        | <b>Source</b> |
|-----------------------------|-------------------------------------------------------------------------------------------|---------------|
| pJC296                      | PGK1pG reporter (under control of GAL1 UAS)                                               | (46)          |
| pJC672                      | PGK1pG reporter with SYNOP ORF (under control of GAL1 UAS)                                | (4)           |
| pJC673                      | PGK1pG reporter with SYNNONOP ORF (under control of GAL1 UAS)                             | (4)           |
| pJC857                      | 0% optimal HIS3 with N-terminal FLAG tag (GAL1 promoter)                                  | (8)           |
| pJC862                      | 50% optimal HIS3 with N-terminal FLAG tag (GAL1 promoter)                                 | (8)           |
| pJC867                      | 100% optimal HIS3 with N-terminal FLAG tag (GAL1 promoter)                                | (8)           |
| pRS416-Not5-HA              | CEN, URA3, Not5-HA (NOT5 promoter)                                                        | This study    |
| pRS415                      | CEN, LEU2                                                                                 | Lab stock     |
| pRS415-Not5-HA              | CEN, LEU2, Not5-HA (NOT5 promoter)                                                        | This study    |
| pRS415-Not5 $\Delta$ NTD-HA | CEN, LEU2, Not5 $\Delta$ NTD-HA (NOT5 promoter), the region from 2 to 113 A.A. is deleted | This study    |
| pRS416-eS7-HA               | CEN, URA3, eS7a-HA (eS7A promoter)                                                        | (12)          |
| pRS315-eS7-HA               | CEN, LEU2, eS7a-HA (eS7A promoter)                                                        | (12)          |
| pRS315-eS7-4KR-HA           | CEN, LEU2, eS7a-4KR-HA (eS7A promoter)                                                    | (12)          |
| pYM032                      | CEN, ADE2, eS7a-WT-HA (eS7A promoter) in pASZ11                                           | Lab stock     |
| pYM033                      | CEN, ADE2, eS7a-4KR-HA (eS7A promoter) in pASZ11                                          | Lab stock     |
| pSM037                      | CEN, URA3, Dhh1-HA (GPD promoter)                                                         | Lab stock     |
| Oligo oJC168                | 5'-AATTCCCCCCCCCCCCCCCCCA-3'                                                              | (46)          |
| Oligo oJC306                | 5'-GTCTAGCCGCGAGGAAGG-3'                                                                  | (46)          |
| Oligo oJC2564               | 5'-CCTGATCCAAACCTTTTTACTCC-3'                                                             | (8)           |

**Movie S1.**

Differential readout of slow translation elongation kinetics by eIF5A and Not5.

## References and Notes

1. M. A. Collart, The Ccr4-Not complex is a key regulator of eukaryotic gene expression. *WIREs RNA* **7**, 438–454 (2016). [doi:10.1002/wrna.1332](https://doi.org/10.1002/wrna.1332) [Medline](#)
2. I. B. Schäfer, M. Yamashita, J. M. Schuller, S. Schüssler, P. Reichelt, M. Strauss, E. Conti, Molecular Basis for poly(A) RNP Architecture and Recognition by the Pan2-Pan3 Deadenylase. *Cell* **177**, 1619–1631.e21 (2019). [doi:10.1016/j.cell.2019.04.013](https://doi.org/10.1016/j.cell.2019.04.013) [Medline](#)
3. R. Parker, RNA degradation in *Saccharomyces cerevisiae*. *Genetics* **191**, 671–702 (2012). [doi:10.1534/genetics.111.137265](https://doi.org/10.1534/genetics.111.137265) [Medline](#)
4. V. Presnyak, N. Alhusaini, Y. H. Chen, S. Martin, N. Morris, N. Kline, S. Olson, D. Weinberg, K. E. Baker, B. R. Graveley, J. Collier, Codon optimality is a major determinant of mRNA stability. *Cell* **160**, 1111–1124 (2015). [doi:10.1016/j.cell.2015.02.029](https://doi.org/10.1016/j.cell.2015.02.029) [Medline](#)
5. A. A. Bazzini, F. del Viso, M. A. Moreno-Mateos, T. G. Johnstone, C. E. Vejnar, Y. Qin, J. Yao, M. K. Khokha, A. J. Giraldez, Codon identity regulates mRNA stability and translation efficiency during the maternal-to-zygotic transition. *EMBO J.* **35**, 2087–2103 (2016). [doi:10.15252/embj.201694699](https://doi.org/10.15252/embj.201694699) [Medline](#)
6. Q. Wu, S. G. Medina, G. Kushawah, M. L. DeVore, L. A. Castellano, J. M. Hand, M. Wright, A. A. Bazzini, Translation affects mRNA stability in a codon-dependent manner in human cells. *eLife* **8**, e45396 (2019). [doi:10.7554/eLife.45396](https://doi.org/10.7554/eLife.45396) [Medline](#)
7. M. W. Webster, Y. H. Chen, J. A. W. Stowell, N. Alhusaini, T. Sweet, B. R. Graveley, J. Collier, L. A. Passmore, mRNA Deadenylation Is Coupled to Translation Rates by the Differential Activities of Ccr4-Not Nucleases. *Mol. Cell* **70**, 1089–1100.e8 (2018). [doi:10.1016/j.molcel.2018.05.033](https://doi.org/10.1016/j.molcel.2018.05.033) [Medline](#)
8. A. Radhakrishnan, Y. H. Chen, S. Martin, N. Alhusaini, R. Green, J. Collier, The DEAD-Box Protein Dhh1p Couples mRNA Decay and Translation by Monitoring Codon Optimality. *Cell* **167**, 122–132.e9 (2016). [doi:10.1016/j.cell.2016.08.053](https://doi.org/10.1016/j.cell.2016.08.053) [Medline](#)
9. P. Tesina, E. Heckel, J. Cheng, M. Fromont-Racine, R. Buschauer, L. Kater, B. Beatrix, O. Berninghausen, A. Jacquier, T. Becker, R. Beckmann, Structure of the 80S ribosome-Xrn1 nuclease complex. *Nat. Struct. Mol. Biol.* **26**, 275–280 (2019). [doi:10.1038/s41594-019-0202-5](https://doi.org/10.1038/s41594-019-0202-5) [Medline](#)
10. L. N. Dimitrova, K. Kuroha, T. Tatematsu, T. Inada, Nascent peptide-dependent translation arrest leads to Not4p-mediated protein degradation by the proteasome. *J. Biol. Chem.* **284**, 10343–10352 (2009). [doi:10.1074/jbc.M808840200](https://doi.org/10.1074/jbc.M808840200) [Medline](#)
11. S. Preissler, J. Reuther, M. Koch, A. Scior, M. Bruderek, T. Frickey, E. Deuerling, Not4-dependent translational repression is important for cellular protein homeostasis in yeast. *EMBO J.* **34**, 1905–1924 (2015). [doi:10.15252/embj.201490194](https://doi.org/10.15252/embj.201490194) [Medline](#)
12. K. Ikeuchi, P. Tesina, Y. Matsuo, T. Sugiyama, J. Cheng, Y. Saeki, K. Tanaka, T. Becker, R. Beckmann, T. Inada, Collided ribosomes form a unique structural interface to induce Hel2-driven quality control pathways. *EMBO J.* **38**, e100276 (2019). [doi:10.15252/embj.2018100276](https://doi.org/10.15252/embj.2018100276) [Medline](#)

13. O. O. Panasenko, M. A. Collart, Presence of Not5 and ubiquitinated Rps7A in polysome fractions depends upon the Not4 E3 ligase. *Mol. Microbiol.* **83**, 640–653 (2012). [doi:10.1111/j.1365-2958.2011.07957.x](https://doi.org/10.1111/j.1365-2958.2011.07957.x) [Medline](#)
14. Z. Villanyi, V. Ribaud, S. Kassem, O. O. Panasenko, Z. Pahi, I. Gupta, L. Steinmetz, I. Boros, M. A. Collart, The Not5 subunit of the ccr4-not complex connects transcription and translation. *PLOS Genet.* **10**, e1004569 (2014). [doi:10.1371/journal.pgen.1004569](https://doi.org/10.1371/journal.pgen.1004569) [Medline](#)
15. N. Alhusaini, J. Collier, The deadenylase components Not2p, Not3p, and Not5p promote mRNA decapping. *RNA* **22**, 709–721 (2016). [doi:10.1261/rna.054742.115](https://doi.org/10.1261/rna.054742.115) [Medline](#)
16. D. Muhlrads, R. Parker, The yeast EDC1 mRNA undergoes deadenylation-independent decapping stimulated by Not2p, Not4p, and Not5p. *EMBO J.* **24**, 1033–1045 (2005). [doi:10.1038/sj.emboj.7600560](https://doi.org/10.1038/sj.emboj.7600560) [Medline](#)
17. R. Basavappa, P. B. Sigler, The 3 A crystal structure of yeast initiator tRNA: Functional implications in initiator/elongator discrimination. *EMBO J.* **10**, 3105–3111 (1991). [doi:10.1002/j.1460-2075.1991.tb07864.x](https://doi.org/10.1002/j.1460-2075.1991.tb07864.x) [Medline](#)
18. J. G. Tate, S. Bamford, H. C. Jubb, Z. Sondka, D. M. Beare, N. Bindal, H. Boutselakis, C. G. Cole, C. Creatore, E. Dawson, P. Fish, B. Harsha, C. Hathaway, S. C. Jupe, C. Y. Kok, K. Noble, L. Ponting, C. C. Ramshaw, C. E. Rye, H. E. Speedy, R. Stefancsik, S. L. Thompson, S. Wang, S. Ward, P. J. Campbell, S. A. Forbes, COSMIC: The Catalogue Of Somatic Mutations In Cancer. *Nucleic Acids Res.* **47**, D941–D947 (2019). [doi:10.1093/nar/gky1015](https://doi.org/10.1093/nar/gky1015) [Medline](#)
19. K. De Keersmaecker, Z. K. Atak, N. Li, C. Vicente, S. Patchett, T. Girardi, V. Gianfelici, E. Geerdens, E. Clappier, M. Porcu, I. Lahortiga, R. Lucà, J. Yan, G. Hulselmans, H. Vranckx, R. Vandepoel, B. Sweron, K. Jacobs, N. Mentens, I. Wlodarska, B. Cauwelier, J. Cloos, J. Soulier, A. Uyttebroeck, C. Bagni, B. A. Hassan, P. Vandenberghe, A. W. Johnson, S. Aerts, J. Cools, Exome sequencing identifies mutation in CNOT3 and ribosomal genes RPL5 and RPL10 in T-cell acute lymphoblastic leukemia. *Nat. Genet.* **45**, 186–190 (2013). [doi:10.1038/ng.2508](https://doi.org/10.1038/ng.2508) [Medline](#)
20. T. V. Budkevich, J. Giesebrecht, E. Behrmann, J. Loerke, D. J. Ramrath, T. Mielke, J. Ismer, P. W. Hildebrand, C. S. Tung, K. H. Nierhaus, K. Y. Sanbonmatsu, C. M. Spahn, Regulation of the mammalian elongation cycle by subunit rolling: A eukaryotic-specific ribosome rearrangement. *Cell* **158**, 121–131 (2014). [doi:10.1016/j.cell.2014.04.044](https://doi.org/10.1016/j.cell.2014.04.044) [Medline](#)
21. C. Schmidt, T. Becker, A. Heuer, K. Braunger, V. Shanmuganathan, M. Pech, O. Berninghausen, D. N. Wilson, R. Beckmann, Structure of the hypusinylated eukaryotic translation factor eIF-5A bound to the ribosome. *Nucleic Acids Res.* **44**, 1944–1951 (2016). [doi:10.1093/nar/gkv1517](https://doi.org/10.1093/nar/gkv1517) [Medline](#)
22. C. C. Wu, B. Zinshteyn, K. A. Wehner, R. Green, High-Resolution Ribosome Profiling Defines Discrete Ribosome Elongation States and Translational Regulation during Cellular Stress. *Mol. Cell* **73**, 959–970.e5 (2019). [doi:10.1016/j.molcel.2018.12.009](https://doi.org/10.1016/j.molcel.2018.12.009) [Medline](#)

23. G. Hanson, N. Alhusaini, N. Morris, T. Sweet, J. Collier, Translation elongation and mRNA stability are coupled through the ribosomal A-site. *RNA* **24**, 1377–1389 (2018). [doi:10.1261/rna.066787.118](https://doi.org/10.1261/rna.066787.118) [Medline](#)
24. A. D. Petropoulos, R. Green, Further in vitro exploration fails to support the allosteric three-site model. *J. Biol. Chem.* **287**, 11642–11648 (2012). [doi:10.1074/jbc.C111.330068](https://doi.org/10.1074/jbc.C111.330068) [Medline](#)
25. T. Suzuki, C. Kikuguchi, S. Sharma, T. Sasaki, M. Tokumasu, S. Adachi, T. Natsume, Y. Kanegae, T. Yamamoto, CNOT3 suppression promotes necroptosis by stabilizing mRNAs for cell death-inducing proteins. *Sci. Rep.* **5**, 14779 (2015). [doi:10.1038/srep14779](https://doi.org/10.1038/srep14779) [Medline](#)
26. L. Y. Chan, C. F. Mugler, S. Heinrich, P. Vallotton, K. Weis, Non-invasive measurement of mRNA decay reveals translation initiation as the major determinant of mRNA stability. *eLife* **7**, e32536 (2018). [doi:10.7554/eLife.32536](https://doi.org/10.7554/eLife.32536) [Medline](#)
27. S. Sohrabi-Jahromi, K. B. Hofmann, A. Boltendahl, C. Roth, S. Gressel, C. Baejen, J. Soeding, P. Cramer, Transcriptome maps of general eukaryotic RNA degradation factors. *eLife* **8**, e47040 (2019). [doi:10.7554/eLife.47040](https://doi.org/10.7554/eLife.47040) [Medline](#)
28. O. O. Panasenkov, S. P. Somasekharan, Z. Villanyi, M. Zagatti, F. Bezrukov, R. Rashpa, J. Cornut, J. Iqbal, M. Longis, S. H. Carl, C. Peña, V. G. Panse, M. A. Collart, Co-translational assembly of proteasome subunits in NOT1-containing assemblyosomes. *Nat. Struct. Mol. Biol.* **26**, 110–120 (2019). [doi:10.1038/s41594-018-0179-5](https://doi.org/10.1038/s41594-018-0179-5) [Medline](#)
29. M. S. Longtine, A. McKenzie 3rd, D. J. Demarini, N. G. Shah, A. Wach, A. Brachat, P. Philippsen, J. R. Pringle, Additional modules for versatile and economical PCR-based gene deletion and modification in *Saccharomyces cerevisiae*. *Yeast* **14**, 953–961 (1998). [doi:10.1002/\(SICI\)1097-0061\(199807\)14:10<953:AID-YEA293>3.0.CO;2-U](https://doi.org/10.1002/(SICI)1097-0061(199807)14:10<953:AID-YEA293>3.0.CO;2-U) [Medline](#)
30. C. Janke, M. M. Magiera, N. Rathfelder, C. Taxis, S. Reber, H. Maekawa, A. Moreno-Borchart, G. Doenges, E. Schwob, E. Schiebel, M. Knop, A versatile toolbox for PCR-based tagging of yeast genes: New fluorescent proteins, more markers and promoter substitution cassettes. *Yeast* **21**, 947–962 (2004). [doi:10.1002/yea.1142](https://doi.org/10.1002/yea.1142) [Medline](#)
31. S. Q. Zheng, E. Palovcak, J. P. Armache, K. A. Verba, Y. Cheng, D. A. Agard, MotionCor2: Anisotropic correction of beam-induced motion for improved cryo-electron microscopy. *Nat. Methods* **14**, 331–332 (2017). [doi:10.1038/nmeth.4193](https://doi.org/10.1038/nmeth.4193) [Medline](#)
32. K. Zhang, Gctf: Real-time CTF determination and correction. *J. Struct. Biol.* **193**, 1–12 (2016). [doi:10.1016/j.jsb.2015.11.003](https://doi.org/10.1016/j.jsb.2015.11.003) [Medline](#)
33. D. Kimanius, B. O. Forsberg, S. H. Scheres, E. Lindahl, Accelerated cryo-EM structure determination with parallelisation using GPUs in RELION-2. *eLife* **5**, e18722 (2016). [doi:10.7554/eLife.18722](https://doi.org/10.7554/eLife.18722) [Medline](#)
34. J. Zivanov, T. Nakane, B. O. Forsberg, D. Kimanius, W. J. Hagen, E. Lindahl, S. H. Scheres, New tools for automated high-resolution cryo-EM structure determination in RELION-3. *eLife* **7**, e42166 (2018). [doi:10.7554/eLife.42166](https://doi.org/10.7554/eLife.42166) [Medline](#)
35. P. Emsley, K. Cowtan, Coot: Model-building tools for molecular graphics. *Acta Crystallogr. D* **60**, 2126–2132 (2004). [doi:10.1107/S0907444904019158](https://doi.org/10.1107/S0907444904019158) [Medline](#)

36. P. V. Afonine, R. W. Grosse-Kunstleve, N. Echols, J. J. Headd, N. W. Moriarty, M. Mustyakimov, T. C. Terwilliger, A. Urzhumtsev, P. H. Zwart, P. D. Adams, Towards automated crystallographic structure refinement with phenix.refine. *Acta Crystallogr. D* **68**, 352–367 (2012). [doi:10.1107/S0907444912001308](https://doi.org/10.1107/S0907444912001308) [Medline](#)
37. T. D. Goddard, C. C. Huang, E. C. Meng, E. F. Pettersen, G. S. Couch, J. H. Morris, T. E. Ferrin, UCSF ChimeraX: Meeting modern challenges in visualization and analysis. *Protein Sci.* **27**, 14–25 (2018). [doi:10.1002/pro.3235](https://doi.org/10.1002/pro.3235) [Medline](#)
38. N. T. Ingolia, G. A. Brar, S. Rouskin, A. M. McGeachy, J. S. Weissman, The ribosome profiling strategy for monitoring translation in vivo by deep sequencing of ribosome-protected mRNA fragments. *Nat. Protoc.* **7**, 1534–1550 (2012). [doi:10.1038/nprot.2012.086](https://doi.org/10.1038/nprot.2012.086) [Medline](#)
39. T. Smith, A. Heger, I. Sudbery, UMI-tools: Modeling sequencing errors in Unique Molecular Identifiers to improve quantification accuracy. *Genome Res.* **27**, 491–499 (2017). [doi:10.1101/gr.209601.116](https://doi.org/10.1101/gr.209601.116) [Medline](#)
40. J. G. Dunn, J. S. Weissman, Plastid: Nucleotide-resolution analysis of next-generation sequencing and genomics data. *BMC Genomics* **17**, 958 (2016). [doi:10.1186/s12864-016-3278-x](https://doi.org/10.1186/s12864-016-3278-x) [Medline](#)
41. C. J. Woolstenhulme, N. R. Guydosh, R. Green, A. R. Buskirk, High-precision analysis of translational pausing by ribosome profiling in bacteria lacking EFP. *Cell Rep.* **11**, 13–21 (2015). [doi:10.1016/j.celrep.2015.03.014](https://doi.org/10.1016/j.celrep.2015.03.014) [Medline](#)
42. S. Anders, W. Huber, Differential expression analysis for sequence count data. *Genome Biol.* **11**, R106 (2010). [doi:10.1186/gb-2010-11-10-r106](https://doi.org/10.1186/gb-2010-11-10-r106) [Medline](#)
43. S. Pechmann, J. Frydman, Evolutionary conservation of codon optimality reveals hidden signatures of cotranslational folding. *Nat. Struct. Mol. Biol.* **20**, 237–243 (2013). [doi:10.1038/nsmb.2466](https://doi.org/10.1038/nsmb.2466) [Medline](#)
44. D. A. Drummond, A. Raval, C. O. Wilke, A single determinant dominates the rate of yeast protein evolution. *Mol. Biol. Evol.* **23**, 327–337 (2006). [doi:10.1093/molbev/msj038](https://doi.org/10.1093/molbev/msj038) [Medline](#)
45. T. Sweet, C. Kovalak, J. Collier, The DEAD-box protein Dhh1 promotes decapping by slowing ribosome movement. *PLOS Biol.* **10**, e1001342 (2012). [doi:10.1371/journal.pbio.1001342](https://doi.org/10.1371/journal.pbio.1001342) [Medline](#)
46. W. Hu, T. J. Sweet, S. Chamnongpol, K. E. Baker, J. Collier, Co-translational mRNA decay in *Saccharomyces cerevisiae*. *Nature* **461**, 225–229 (2009). [doi:10.1038/nature08265](https://doi.org/10.1038/nature08265) [Medline](#)
47. Y. Matsuo, K. Ikeuchi, Y. Saeki, S. Iwasaki, C. Schmidt, T. Udagawa, F. Sato, H. Tsuchiya, T. Becker, K. Tanaka, N. T. Ingolia, R. Beckmann, T. Inada, Ubiquitination of stalled ribosome triggers ribosome-associated quality control. *Nat. Commun.* **8**, 159 (2017). [doi:10.1038/s41467-017-00188-1](https://doi.org/10.1038/s41467-017-00188-1) [Medline](#)
